# Supplementary material
Source: MDPI journal article supplement (https://www.mdpi.com/2227-9717/9/4/671)
Supplement: s1 [file s1]

## Supplementary Materials

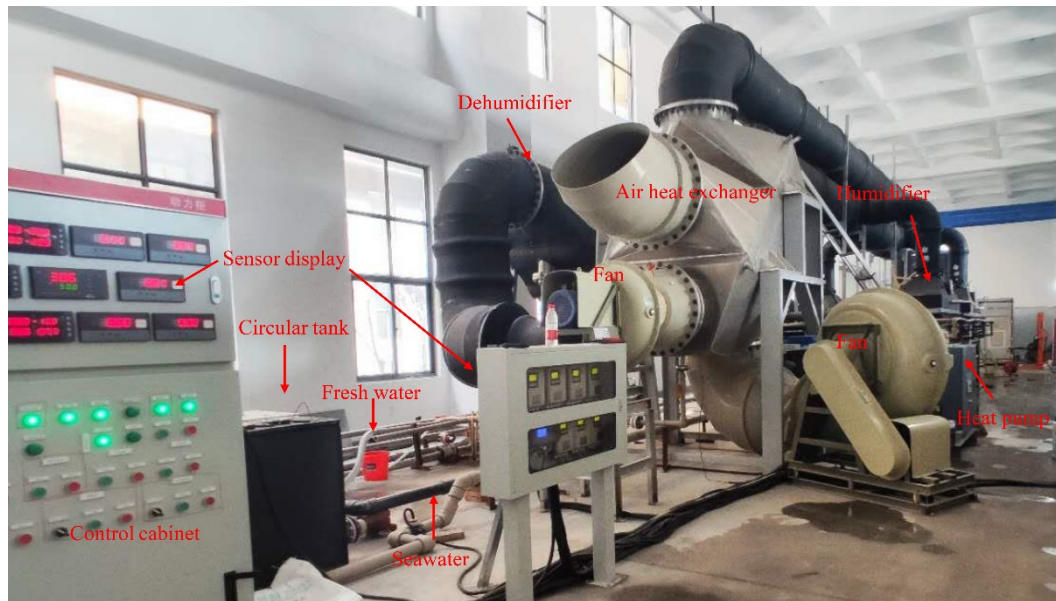

Figure S1. Image of the humidification and dehumidification device.

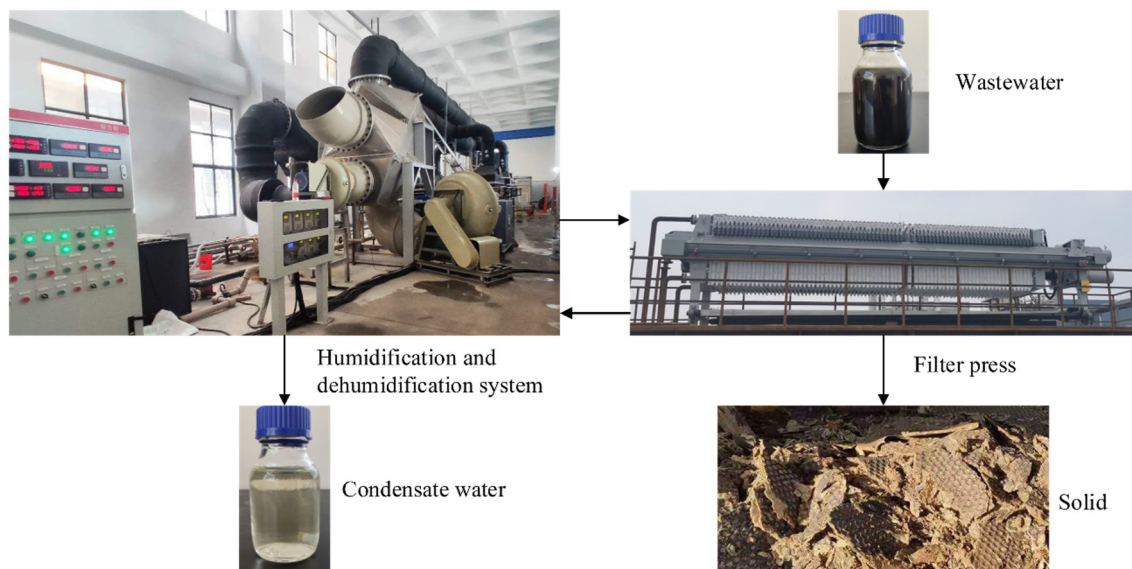

Figure S2. System operation roadmap.
